# Supplementary material
Source: publisher site journal article supplement (https://www.dovepress.com/article/423993)
Supplement: Supplementary file 1 [file get_supplementary_file.php]

**Supplementary appendix**

**Supplementary Table 1** Sociodemographic and clinical characteristics examined as of the index date/during the baseline period

| **Variable** | **Definition** |
| --- | --- |
| **Evaluated on the index date** | |
| Age | Age was identified as a continuous variable and as a categorical variable for the following age groups: 40–54, 55–64, 65–74, and ≥75 years |
| Sex | Male and female patients identified by a binary indicator from enrollment data |
| Geographic region | Patients residing in the following regions as of the index date:   - Northeast - Midwest - South - West - Unknown |
| Payer type | Commercial or Medicare payers |
| Health plan type | The following healthcare plans were identified:   - Indemnity - Non-capitated point of service - Health maintenance organization - Preferred provider organization - Exclusive provider organization - Others |
| **Evaluated during the pre-treatment period (12 months prior to the index date)** | |
| CCI | The CCI assigns a weight ranging from 1–6 according to disease severity for 19 conditions.1 The CCI has since adopted several weights, which allow outpatient diagnoses to contribute to the score. CCI score predicts 10-year survival in patients with multiple comorbidities, with higher scores meaning a higher predicted mortality rate.2 CCI score has also been shown to predict resource use over a 10-month period.3 The Deyo-modified CCI was used.4,5 CCI scores were also categorized as 0–2, 2–4, and >4 as a proxy for baseline severity. |
| COPD severity score | Developed by Wu et al, the score is based on the sum of 12 weighted, claims-based components and is bounded by 0, with no upper limit; it was calculated for each patient.6 The value of each component and the weighted COPD severity score in the baseline period was examined for each patient. |
| Individual comorbidities | Individual baseline comorbidities during the 12-month baseline period were assessed for all patients:   - Anxiety - Asphyxia and respiratory arrest - Cardiovascular disease - Cataracts - Chronic renal failure - Depression - Diabetes - Gastroesophageal reflux disease - Glaucoma - Obesity - Pneumonia - Pulmonary fibrosis - Pulmonary vascular disease - Respiratory infection or distress - Smoking - Thoracic malignancies |
| COPD treatments | Use of non-index COPD therapies was identified using NDC and HCPCS codes and reported as a binary indicator, including:   - ICS - LABA - LAMA - FDC dual-therapy LAMA/LABA - SABA - SAMA - FDC dual-therapy SABA/SAMA |
| **Evaluated during the 12-month pre-treatment period or on the index date and 12-month post-treatment initiation period** | |
| COPD exacerbations | The total number of moderate and severe exacerbations and the number of unique patients with moderate and severe exacerbations was reported. The total number of any, moderate, and severe COPD exacerbation episodes during the baseline period was determined. Each episode may consist of multiple healthcare encounters (exacerbation events). The exacerbation events ended when 7 days pass without any other exacerbation events. COPD exacerbation events were defined as follows:   - Moderate: An outpatient or ER visit with a COPD diagnosis and ≥1 dispensing of an oral corticosteroid within 7 days following that visit - Severe: An inpatient hospital stay with a primary diagnosis of COPD or respiratory failure (ICD-9-CM: 518.81, 518.82, or 518.84, ICD-10-CM: J96.0x, J96.2x, or J96.9x) with a secondary diagnosis of COPD   If the moderate and severe exacerbations overlap, the exacerbation was flagged as a severe exacerbation. If two moderate exacerbations overlap, the one that occurs first was counted. If two severe exacerbations overlap, the one that occurs first was counted. Exacerbations that occur on the index date were considered baseline exacerbations and these were flagged and reported separately. |
| Asthma exacerbations | The number and proportion of patients who experienced any asthma exacerbation was assessed.   - Any outpatient or ER claim with a diagnosis of asthma and ≥1 claim for a systemic corticosteroid (intramuscular, intravenous, oral) ± 5 days following that visit; and/or - Any inpatient hospital admission with a primary diagnosis of asthma, and this was defined as exacerbation resulting in hospitalization.   The percentage of patients who experience an exacerbation resulting in a hospitalization was reported separately. Exacerbations that occur on the index date were considered baseline exacerbations and these was flagged and reported separately. |
| All-cause HCRU | All-cause HCRU including inpatient and outpatient (ER, office, other) visits, hospitalization length of stay for inpatient admits office visits, and pharmacy use was identified. |
| All-cause healthcare costs | All-cause healthcare costs were computed. Costs were adjusted to 2020 US dollars using the medical care component of the CPI and included inpatient, outpatient (ER, office, other), pharmacy, and total costs. |
| COPD-related HCRU | COPD-related HCRU including inpatient and outpatient (ER, office, other) visits, hospitalization length of stay for inpatient admits office visits, and pharmacy use was identified by observing medical claims with COPD diagnosis codes in the primary position and pharmacy claims for COPD treatments. |
| COPD-related healthcare costs | COPD-related healthcare costs were computed. Costs were adjusted to 2020 US dollars using the medical care component of the CPI and included inpatient, outpatient (ER, office, other), pharmacy, and total costs. |
| Duration of index therapy | The duration each patient is on the index therapy was captured in days. |
| PDC | PDC was defined as the number of days in the study period “covered” by a medication divided by the total number of days during the follow-up period. |

**Abbreviations:** CCI, Charlson Comorbidity Index; COPD, chronic obstructive pulmonary disease; CPI, Consumer Price Index; ER, emergency room; FDC, fixed-dose combination; HCPCS, Healthcare Common Procedure Coding System; HCRU, healthcare resource utilization; ICD-(CM), International Classification of Diseases-(Clinical Modification); ICS, inhaled corticosteroid; LABA, long-acting β2-agonist; LAMA, long-acting muscarinic antagonist; NDC, National Drug Code; PDC, proportion of days covered; SABA, short-acting β2-agonist; SAMA, short-acting muscarinic antagonist; US, United States.

**Supplementary references**

1. Charlson M, Szatrowski TP, Peterson J, Gold J. Validation of a combined comorbidity index. *J Clin Epidemiol*. 1994;47(11):1245–1251. doi:10.1016/0895-4356(94)90129-5
2. Quan H, Li B, Couris CM, et al. Updating and validating the Charlson comorbidity index and score for risk adjustment in hospital discharge abstracts using data from 6 countries. *Am J Epidemiol.* 2011;173(6):676–682.
3. Bayliss EA, Ellis JL, Shoup JA, Zeng C, McQuillan DB, Steiner JF. Association of patient-centered outcomes with patient-reported and ICD-9-based morbidity measures. *Ann Fam Med.* 2012;10(2):126–133.
4. de Groot V, Beckerman H, Lankhorst GJ, Bouter LM. How to measure comorbidity. a critical review of available methods. *J Clin Epidemiol*. 2003;56(3):221–229. doi:10.1016/s0895-4356(02)00585-1
5. Deyo RA, Cherkin DC, Ciol MA. Adapting a clinical comorbidity index for use with ICD-9-CM administrative databases. *J Clin Epidemiol*. 1992;45(6):613–619. doi:10.1016/0895-4356(92)90133-8
6. Wu EQ, Birnbaum HG, Cifaldi M, Kang Y, Mallet D, Colice G. Development of a COPD severity score. *Curr Med Res Opin*. 2006;22(9):1679–1687. doi:10.1185/030079906x115621
